# Supplementary material for: Organic–Inorganic Manganese (II) Halide Hybrid Combining the Two Isomers Cis/Trans of [MnCl4(H2O)2]: Crystal Structure, Physical Properties, Pharmacokinetics and Biological Evaluation
Source: MDPI journal article supplement (doi:10.3390/inorganics11020076), 2023-02-04
Supplement: s1 [file s1]

Supplementary Material:

**Table S1.** Crystal data and structure refinement for  $(C_5H_{14}N_2)[MnCl_4(H_2O)_2]$ .

|                                             |                                                     |
|---------------------------------------------|-----------------------------------------------------|
| Empirical formula                           | $(C_5H_{14}N_2)[MnCl_4(H_2O)_2]$                    |
| Crystal color /shape                        | Plate, colourless                                   |
| Formula weight (g mol <sup>-1</sup> )       | 334.95                                              |
| Volume (Å <sup>3</sup> )                    | 1270.2 (3)                                          |
| $\rho_{\text{cal}}$ (Mg m <sup>-3</sup> )   | 1.752                                               |
| Crystal system                              | monoclinic                                          |
| Space group                                 | P2/c                                                |
| Z                                           | 4                                                   |
| a(Å)                                        | 12.394 (14)                                         |
| b(Å)                                        | 9.408 (11)                                          |
| c(Å)                                        | 11.879 (14)                                         |
| $\alpha$ (°)                                | 90                                                  |
| $\beta$ (°)                                 | 113.518 (4)                                         |
| $\gamma$ (°)                                | 90                                                  |
| $\theta$ range for data collection (°)      | 2.2< $\theta$ < 27.6                                |
| Temperature (k)                             | 150                                                 |
| $\lambda$ (Moka) (Å)                        | 0.71073                                             |
| Absorption correction                       | Multi-scan                                          |
| Crystal size (mm <sup>3</sup> )             | 0.46*0.44*0.09                                      |
| h.k.l range                                 | -16<h<16, -12<k<10, -15<l<15                        |
| Diffractometer                              | D8 VENTURE Bruker AXS                               |
| Programs systems                            | SHELXT- 2015 and SHELXL-2018                        |
| No.of reflections collected                 | 10704                                               |
| No. of independant reflection               | 2925                                                |
| No. of reflections observed ( $I > 2s(I)$ ) | 2681                                                |
| Rint                                        | 0.061                                               |
| F(000)                                      | 684                                                 |
| No.of parameters                            | 152                                                 |
| Goodness of fit                             | 0.95                                                |
| Transmission factors                        | $T_{\text{max}} = 0.846$ , $T_{\text{min}} = 0.490$ |
| Rindices                                    | R= 0.042, WR= 0.106                                 |

**Table S2.** Main distances (Å) and angles (°) for (C<sub>5</sub>H<sub>14</sub>N<sub>2</sub>)[MnCl<sub>4</sub>(H<sub>2</sub>O)<sub>2</sub>] atomic arrangement.

| MnCl <sub>4</sub> (H <sub>2</sub> O) <sub>2</sub> octahedron anion |              | C <sub>5</sub> H <sub>14</sub> N <sub>2</sub> organic cation |             |
|--------------------------------------------------------------------|--------------|--------------------------------------------------------------|-------------|
| Parameter                                                          | value        | Parameter                                                    | value       |
| Mn1—O1                                                             | 2.1838 (15)  | C1—N2                                                        | 1.494 (3)   |
| Mn1—O1 <sup>i</sup>                                                | 2.1838 (15)  | C1—C7                                                        | 1.510 (3)   |
| Mn1—Cl1 <sup>i</sup>                                               | 2.4929 (6)   | N2—C3                                                        | 1.496 (3)   |
| Mn1—Cl2                                                            | 2.5909 (6)   | C3—C4                                                        | 1.520 (3)   |
| Mn1—Cl2 <sup>i</sup>                                               | 2.5909 (6)   | C4—C5                                                        | 1.510 (3)   |
| Mn2—O11                                                            | 2.2331 (16)  | C5—N6                                                        | 1.514 (3)   |
| Mn2—O11 <sup>ii</sup>                                              | 2.2331 (16)  | N6—C7                                                        | 1.495 (3)   |
| Mn2—Cl11 <sup>ii</sup>                                             | 2.4888 (6)   | N2—C1—C7                                                     | 114.34 (18) |
| Mn2—Cl11                                                           | 2.4888 (6)   | C1—N2—C3                                                     | 115.12 (17) |
| Mn2—Cl12 <sup>ii</sup>                                             | 2.6049 (6)   | N2—C3—C4                                                     | 111.65 (18) |
| Mn2—Cl12                                                           | 2.6049 (6)   | C5—C4—C3                                                     | 115.40 (18) |
| O1—Mn1—O1 <sup>i</sup>                                             | 171.81 (10)  | C4—C5—N6                                                     | 115.01 (17) |
| O1—Mn1—Cl1 <sup>i</sup>                                            | 91.42 (5)    | C7—N6—C5                                                     | 117.94 (16) |
| O1i—Mn1—Cl1 <sup>i</sup>                                           | 94.37 (5)    | N6—C7—C1                                                     | 112.32 (18) |
| O1—Mn1—Cl1                                                         | 94.37 (5)    |                                                              |             |
| O1i—Mn1—Cl1                                                        | 91.42 (5)    |                                                              |             |
| Cl1i—Mn1—Cl1                                                       | 90.00 (3)    |                                                              |             |
| O1—Mn1—Cl2                                                         | 89.12 (5)    |                                                              |             |
| O1i—Mn1—Cl2                                                        | 84.89 (5)    |                                                              |             |
| Cl1i—Mn1—Cl2                                                       | 92.13 (2)    |                                                              |             |
| Cl1—Mn1—Cl2                                                        | 175.865 (18) |                                                              |             |
| O1—Mn1—Cl2 <sup>i</sup>                                            | 84.89 (5)    |                                                              |             |
| O1i—Mn1—Cl2 <sup>i</sup>                                           | 89.12 (5)    |                                                              |             |
| Cl1i—Mn1—Cl2 <sup>i</sup>                                          | 175.865 (18) |                                                              |             |
| Cl1—Mn1—Cl2 <sup>i</sup>                                           | 92.13 (2)    |                                                              |             |
| Cl2—Mn1—Cl2 <sup>i</sup>                                           | 85.96 (3)    |                                                              |             |
| O11—Mn2—O11 <sup>ii</sup>                                          | 85.60 (8)    |                                                              |             |
| O11—Mn2—Cl11 <sup>ii</sup>                                         | 87.92 (4)    |                                                              |             |
| O11ii—Mn2—Cl11 <sup>ii</sup>                                       | 170.86 (4)   |                                                              |             |
| O11—Mn2—Cl11                                                       | 170.86 (4)   |                                                              |             |
| O11ii—Mn2—Cl11                                                     | 87.92 (4)    |                                                              |             |
| Cl11ii—Mn2—Cl11                                                    | 99.21 (3)    |                                                              |             |
| O11—Mn2—Cl12 <sup>ii</sup>                                         | 91.63 (4)    |                                                              |             |
| O11ii—Mn2—Cl12 <sup>ii</sup>                                       | 84.83 (4)    |                                                              |             |
| Cl11ii—Mn2—Cl12 <sup>ii</sup>                                      | 88.915 (17)  |                                                              |             |
| Cl11—Mn2—Cl12 <sup>ii</sup>                                        | 88.915 (17)  |                                                              |             |
| Cl12ii—Mn2—Cl12                                                    | 175.18 (3)   |                                                              |             |

**Table S3.** Observed vibration frequencies ( $\text{cm}^{-1}$ ) and band assignments for  $(\text{C}_5\text{H}_{14}\text{N}_2)[\text{MnCl}_4(\text{H}_2\text{O})_2]$ .

| observed | Assignment                         |
|----------|------------------------------------|
| 3118     | $\nu_{\text{as}}(\text{N-H})$      |
| 3051     | $\nu_{\text{s}}(\text{N-H})$       |
| 2805     | $\nu_{\text{s}}(\text{C-H})$       |
| 1647     | $\nu_{\text{a}}(\text{C-H})$       |
| 1570     | $\delta(\text{NH}_2)$              |
| 1450     | $\delta_{\text{as}}(\text{C-N-H})$ |
| 1385     | $\delta(\text{CH}_2)$              |
| 1333     | $\delta(\text{CH}_2)$              |
| 1103     | $\nu_{\text{as}}(\text{C-N})$      |
| 1065     | $\nu_{\text{as}}(\text{C-N})$      |
| 1021     | $\nu_{\text{as}}(\text{C-C})$      |
| 976      | $\rho(\text{NH}_2)$                |
| 880      | $\delta(\text{C-C-C})$             |
| 780      | $\delta(\text{C-C-N})$             |
| 529      | $\delta(\text{C-N-C})$             |

Abbreviations:  $\nu$  - stretching;  $\delta$  - bending;  $\rho$  - rocking; s: Symmetric; as: Asymmetric.

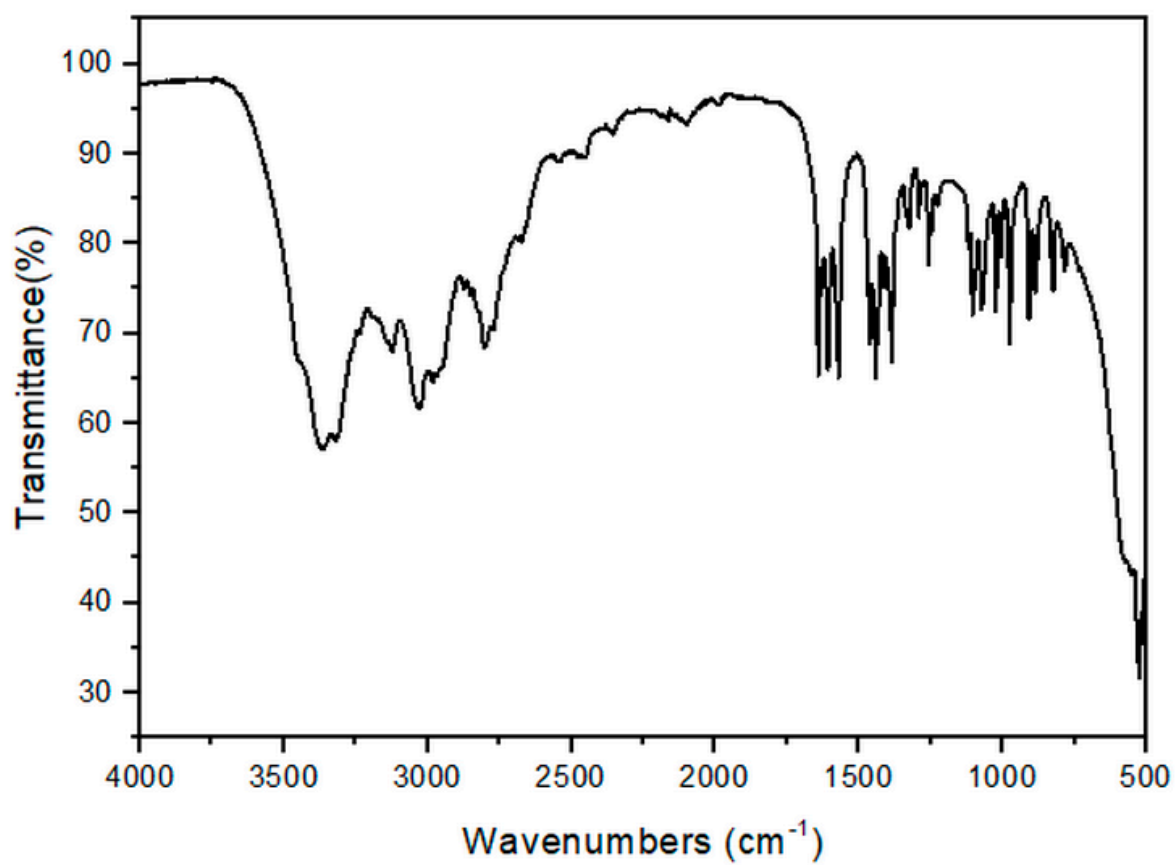

**Figure S1.** Infrared absorption spectra of the studied compound
